# Supplementary material for: PANI-Based Wearable Electrochemical Sensor for pH Sweat Monitoring
Source: MDPI journal article supplement (doi:10.3390/chemosensors9070169), 2021-07-05
Supplement: s1 [file s1]

# PANI Based Wearable Electrochemical Sensor for pH Sweat Monitoring

Francesca Mazzara<sup>1</sup>, Bernardo Patella<sup>1</sup>, Chiara D'Agostino<sup>1</sup>, Maria Giuseppina Bruno<sup>1</sup>, Sonia Carbone<sup>1</sup>, Francesco Lopresti<sup>1</sup>, Giuseppe Aiello<sup>1</sup>, Claudia Torino<sup>2</sup>, Antonio Vilasi<sup>2</sup>, Alan O'Riordan<sup>3</sup>, Rosalinda Inguanta<sup>1,\*</sup>

<sup>1</sup> Applied Physical Chemistry Lab, Department of Engineering, Università degli Studi di Palermo, Viale delle Scienze, 90128 Palermo, Italy

<sup>2</sup> Istituto di Fisiologia Clinica (IFC)-Consiglio Nazionale delle Ricerche-Reggio Calabria, Italy

<sup>3</sup> Nanotechnology group, Tyndall National Institute, University College Cork, Dyke Prade, Cork, Ireland

\* Correspondence: [rosalinda.inguanta@eunipa.it](mailto:rosalinda.inguanta@eunipa.it)

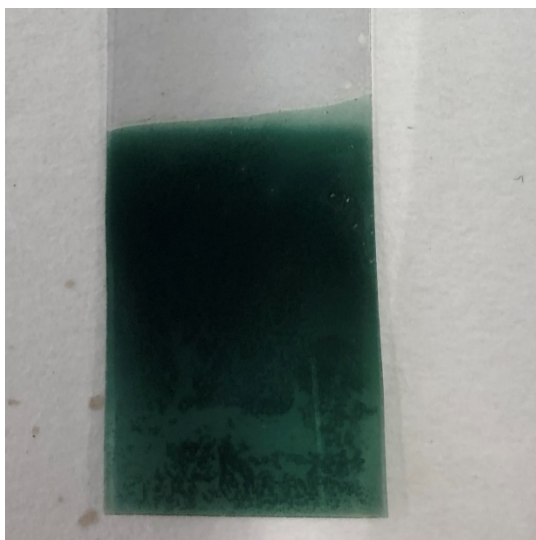

*Figure S1 Thin film of PANI on ITO-PET substrate electrode*

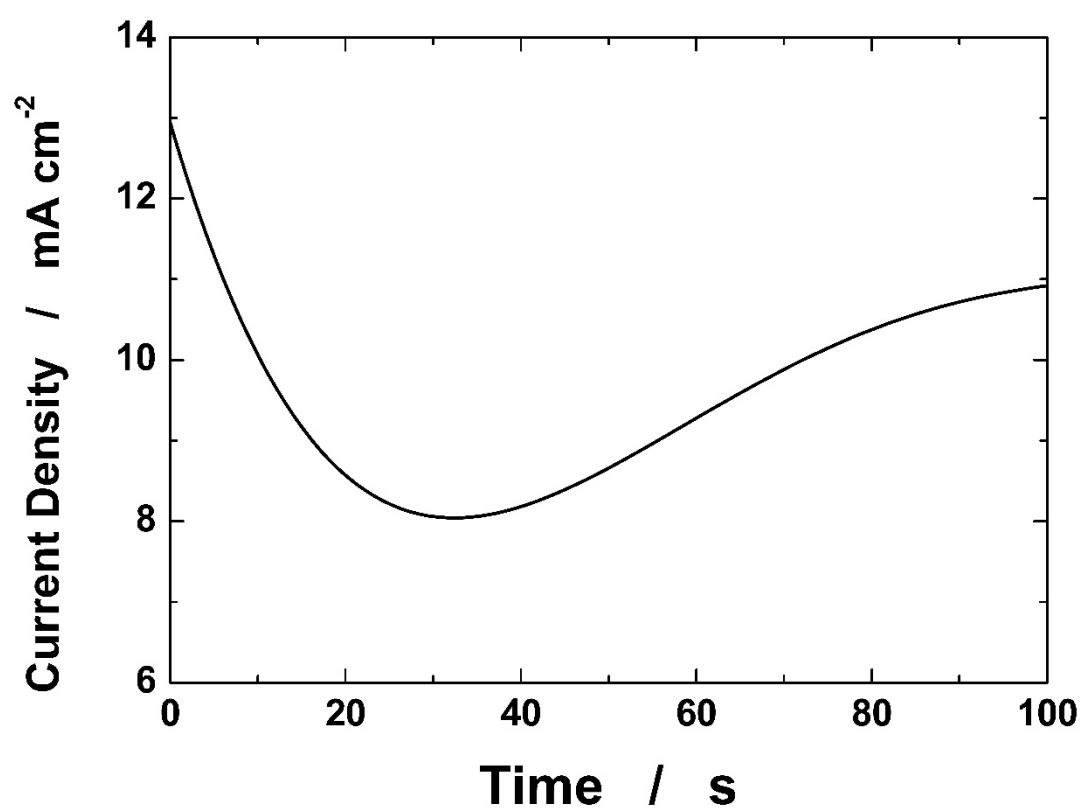

Figure S2 Growth curve for the electrochemical deposition of PANI on ITO-PET/rGO substrate

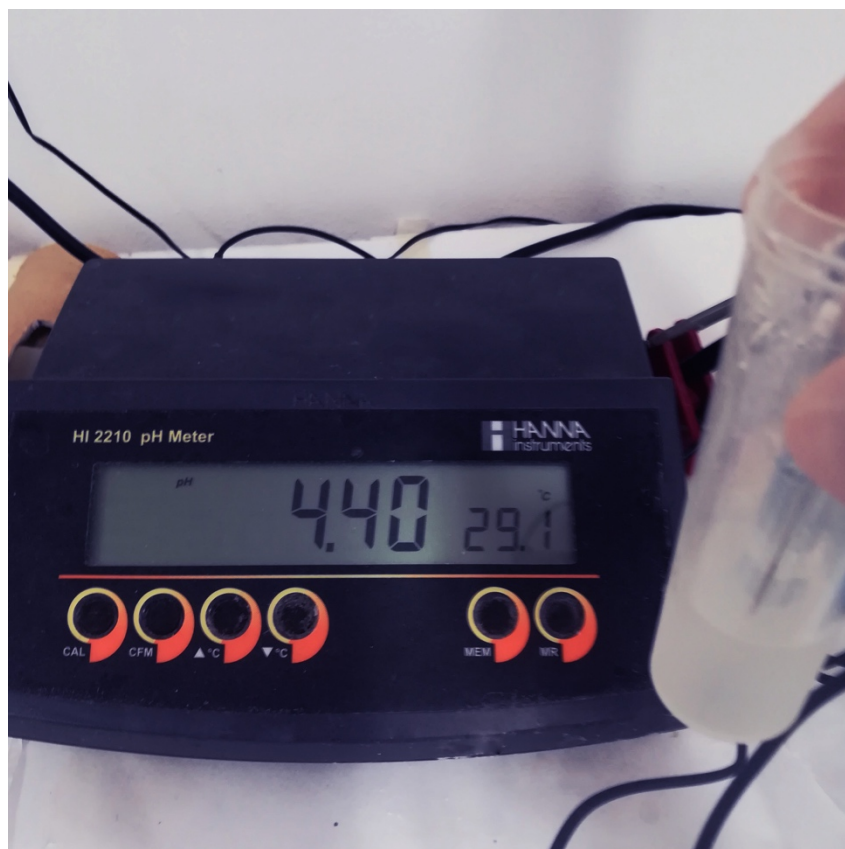

*Figure S3: Measurement of the pH of a real sweat sample using a laboratory pH meter.*
